# Supplementary material
Source: PubMed Central journal article supplement (PMC3121498)

Supp. Figure S1

Fig. S1. Co-expression of neuroserpin does not alter distribution of Hrd1 or gp78. 293 cells were transfected with HA tag or HA tagged G392E neuroserpin, along with FLAG tagged Hrd1 or gp78. Twenty-four hours after transfection, cells were fractionated into cytosol (c) and microsomal membrane (m) parts and subjected to immunoblot analysis using HA, FLAG or Calnexin antibody. Calnexin served as a control for the ER.

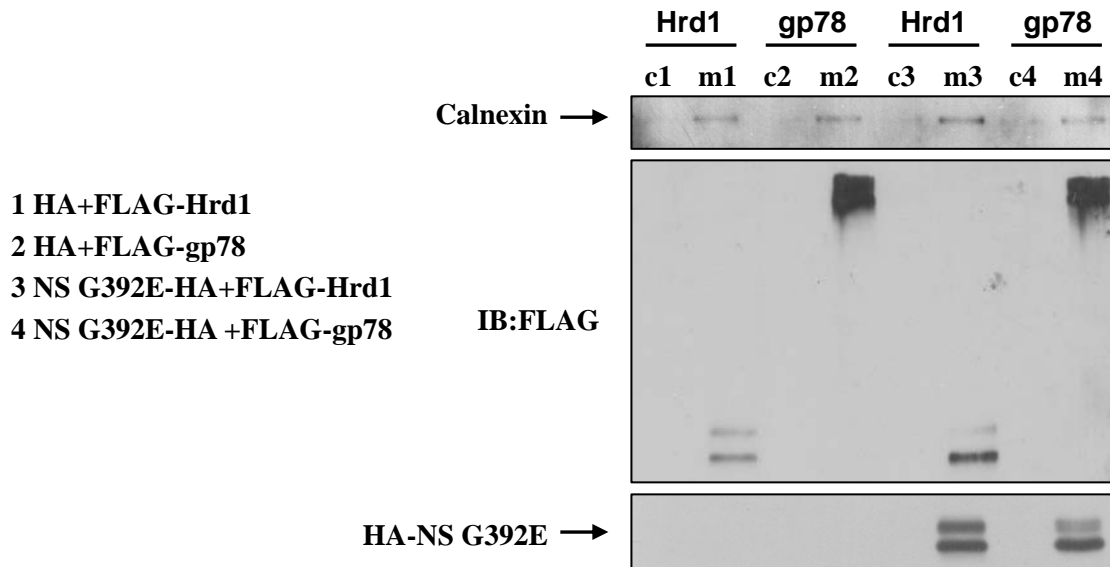

Supp. Figure S2

Fig. S2. 293 cells were transfected with FLAG-tagged Hrd1 or His-tagged VCP, along with siRNAs targeting Hrd1 or VCP. Seventy-Two hours after transfection, the indicated proteins were detected using immunoblot analysis using FLAG, His or Tubulin antibody.

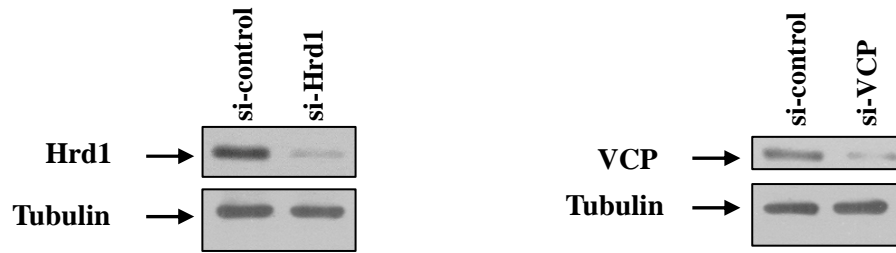

Supplement: supp_M110.200808_jbc.M110.200808-1.pdf [file supp_M110.200808_jbc.M110.200808-1.pdf]
